# Supplementary material
Source: PubMed Central journal article supplement (PMC8997244)
Supplement: NIHMS1794337-supplement-1.pdf [file NIHMS1794337-supplement-1.pdf]

## Supplementary Information

Patterns of Genomic Interrelatedness of Publicly Available Samples in the TB Portals Database.

Kurt R. Wollenberg, Brendan M. Jeffrey, Michael A. Harris, Andrei Gabrielian, Darrell E. Hurt,  
and Alex Rosenthal

Office of Cyber Infrastructure and Computational Biology, National Institute of Allergy and  
Infectious Disease, National Institutes of Health, Bethesda, Maryland, USA

Table of Contents

|                             |   |
|-----------------------------|---|
| Supplementary Figure 1..... | 3 |
| Supplementary Figure 2..... | 4 |

Supplementary Figures

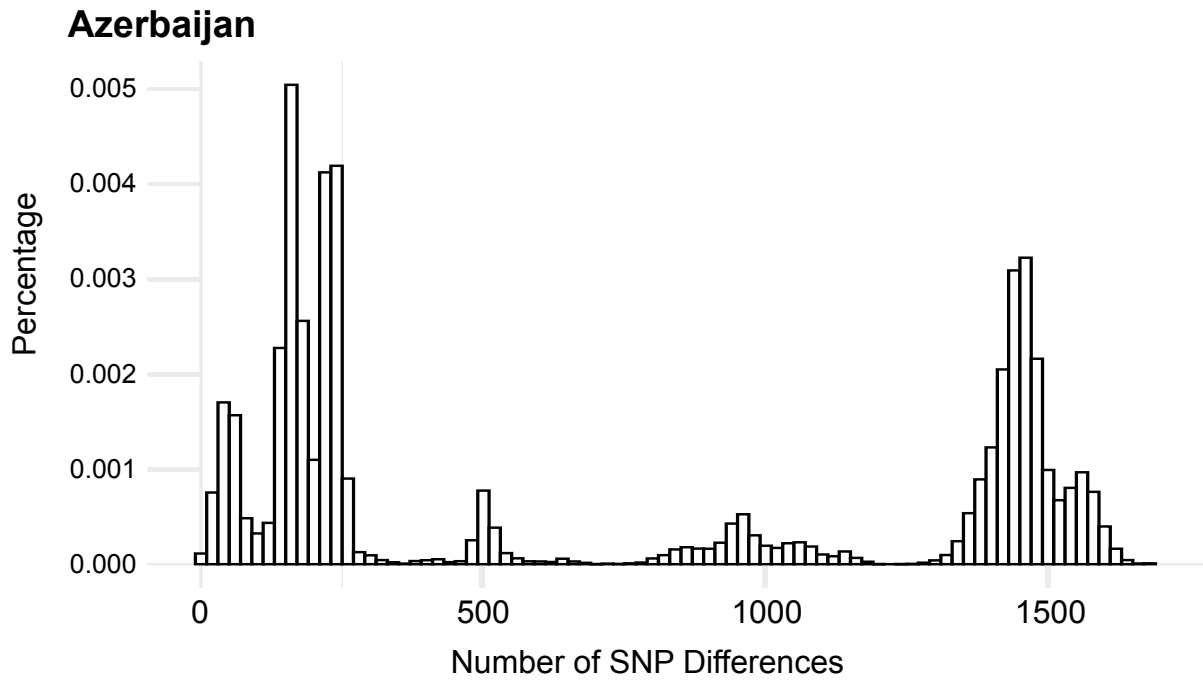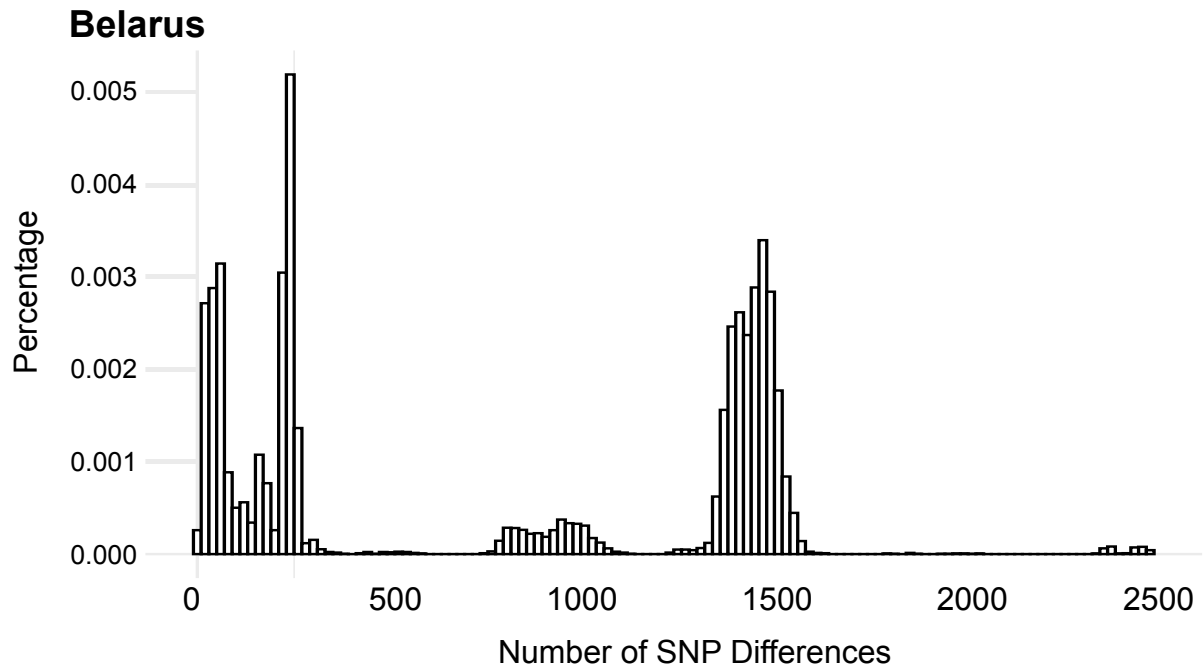

### Georgia

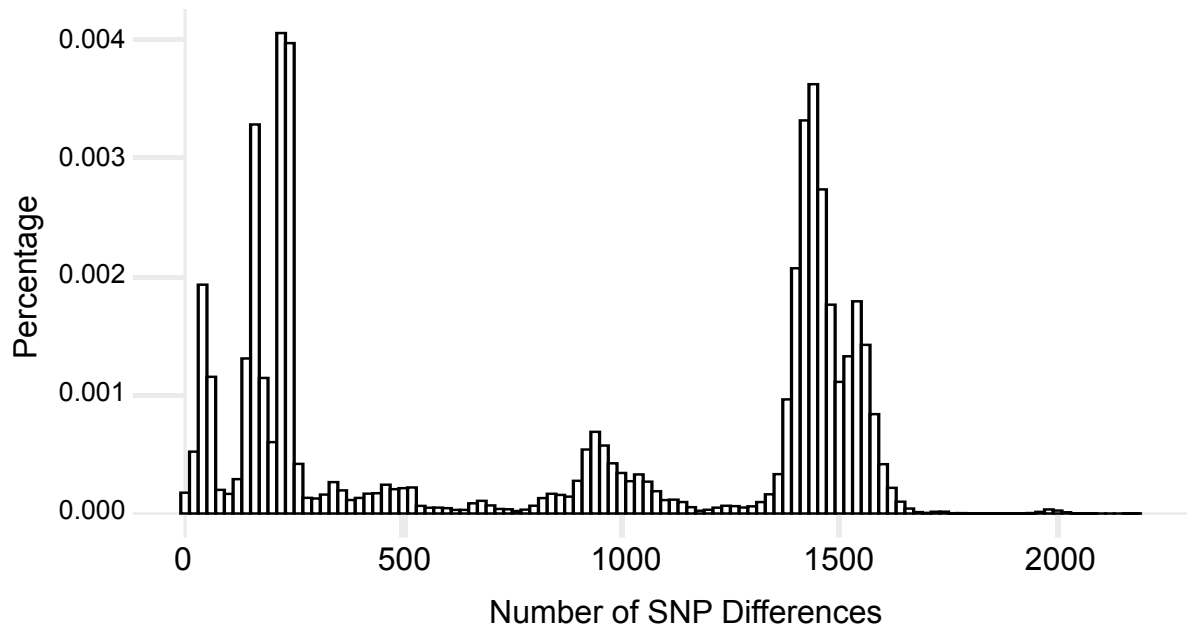

### Kazakhstan

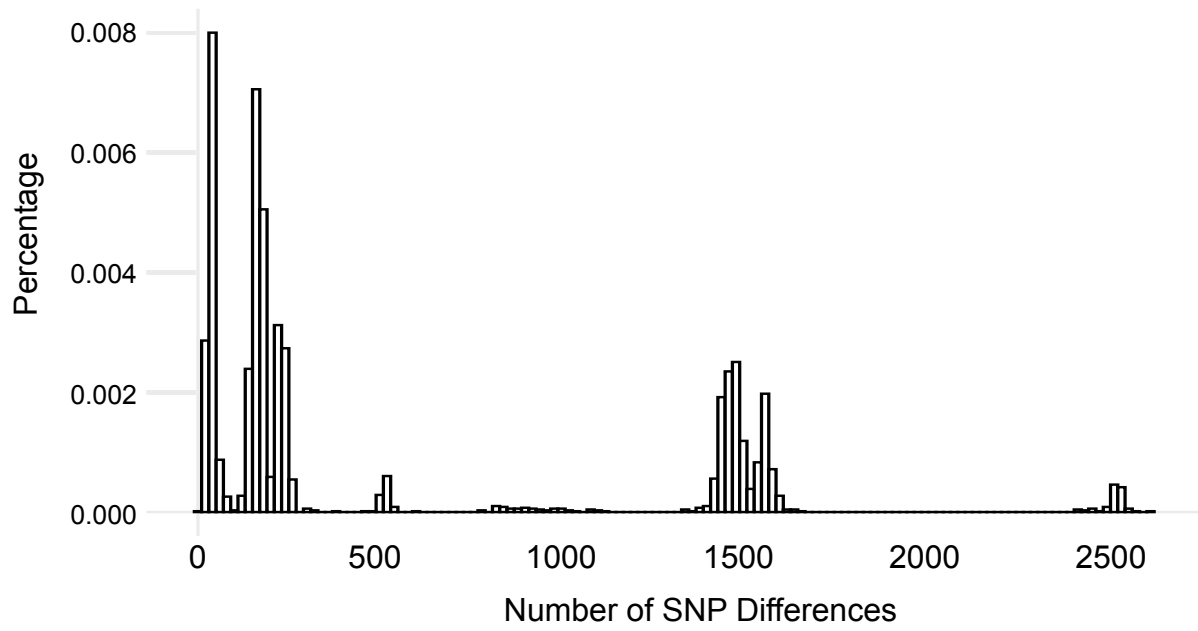

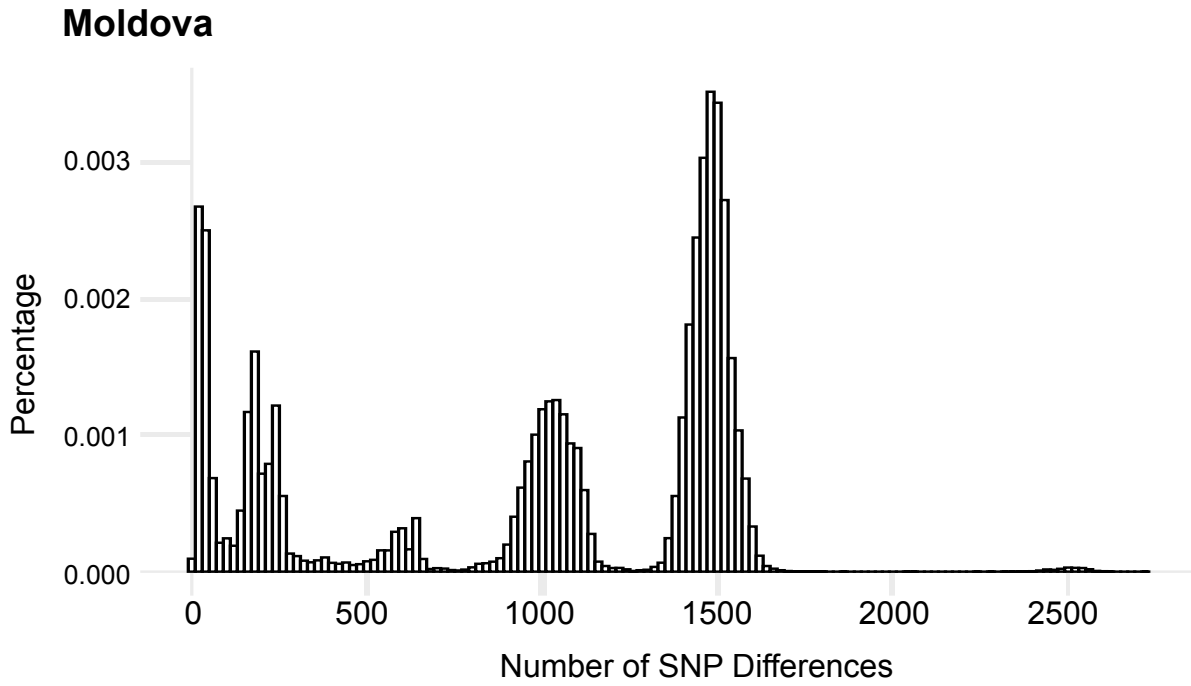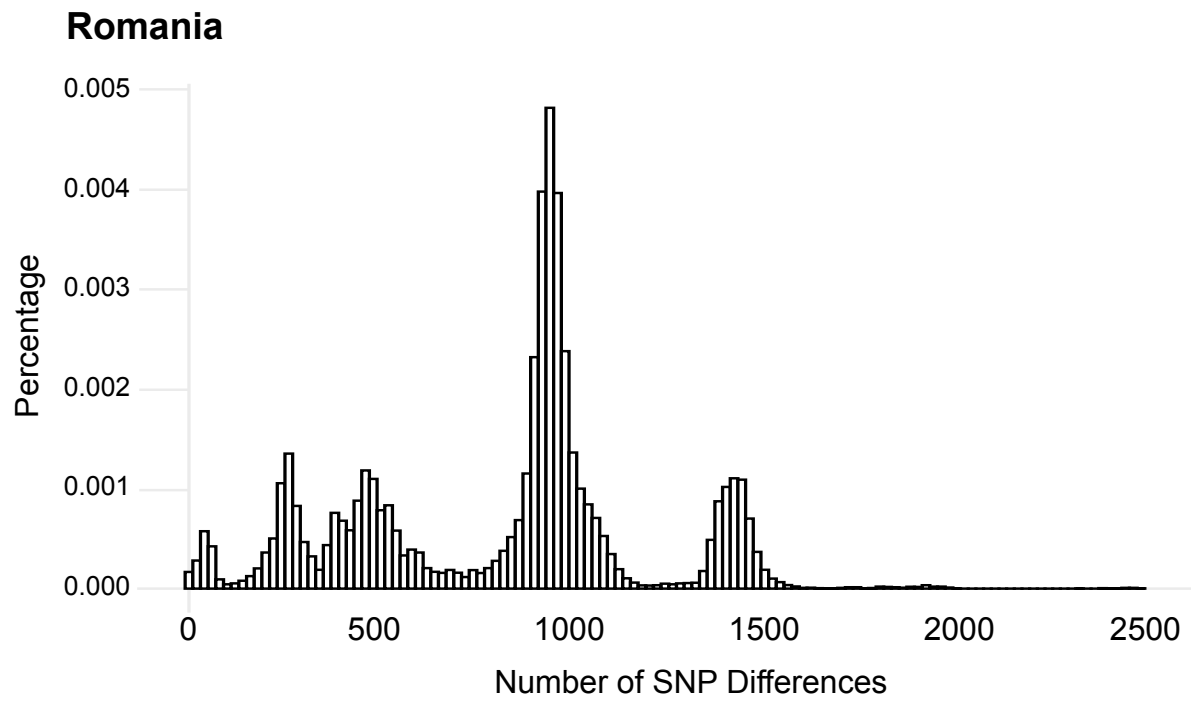

Supplementary Figure 1. Frequency histograms of pairwise distances within countries.

### Lineage 2

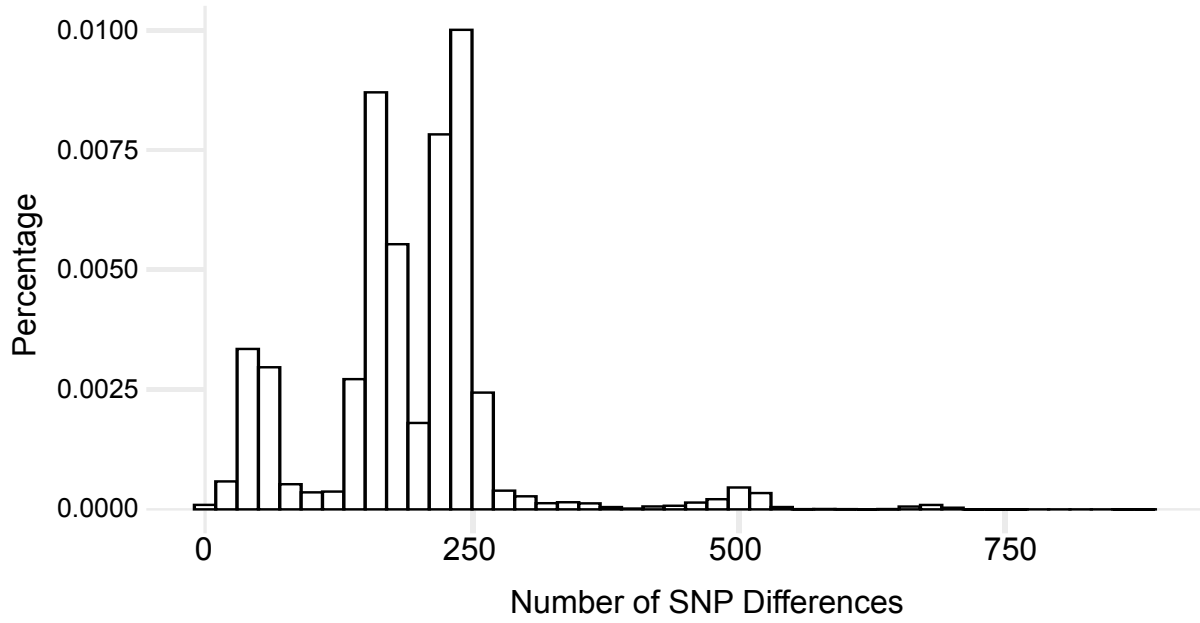

### Lineage 2.2.1

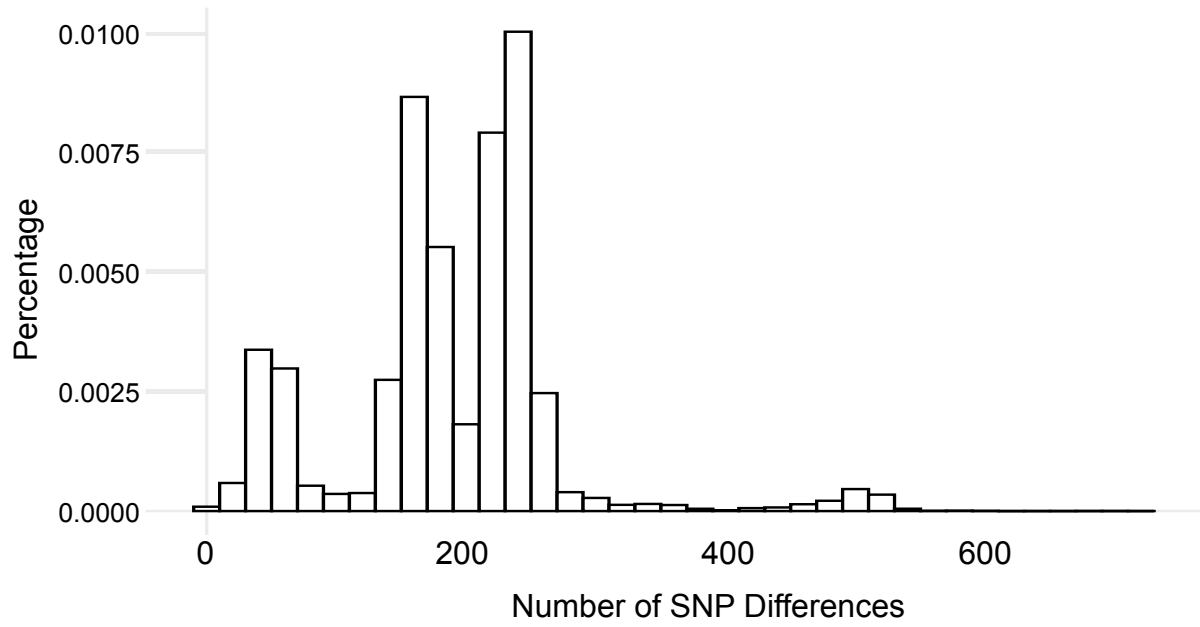

### Lineage 4

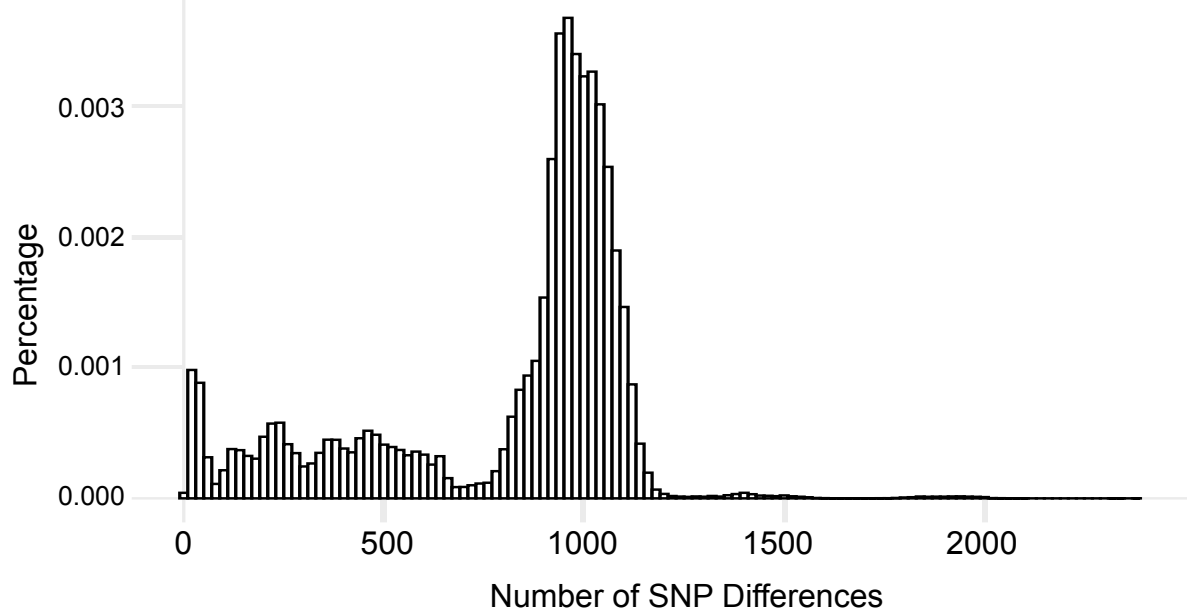

### Lineage 4.1.2.1

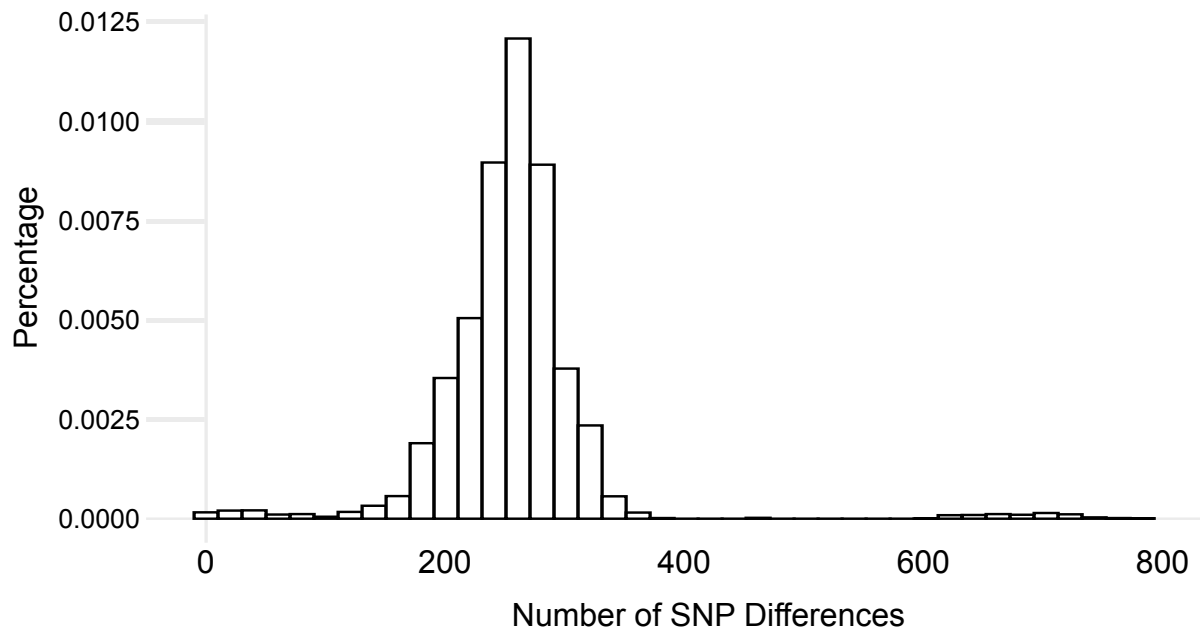

### Lineage 4.2.1

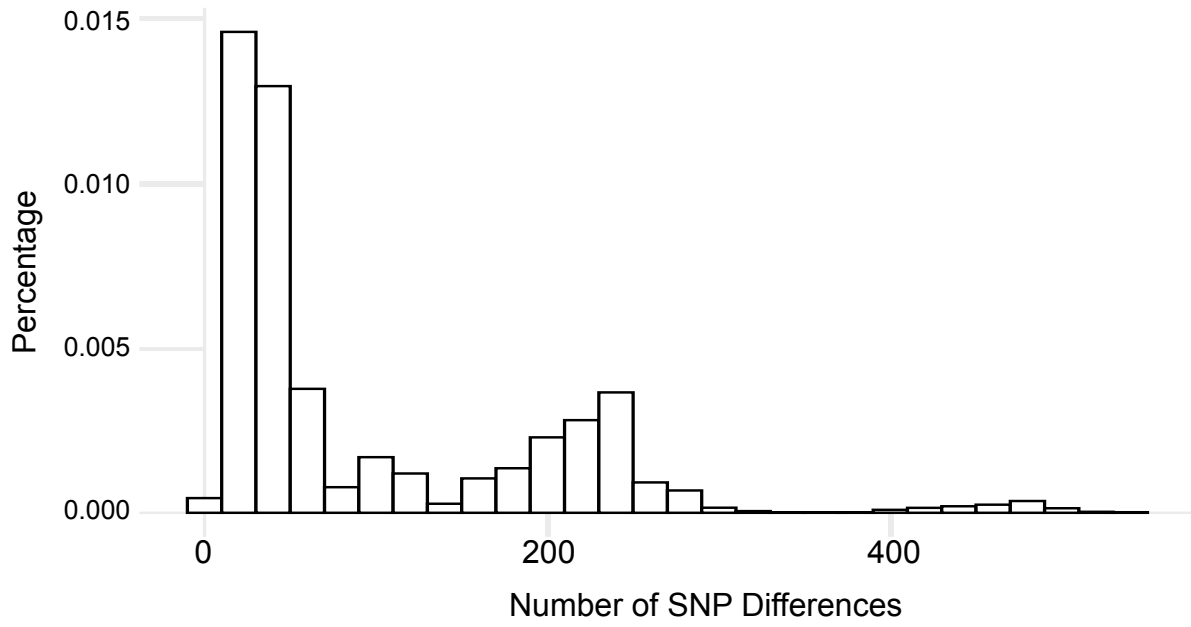

### Lineage 4.3.3

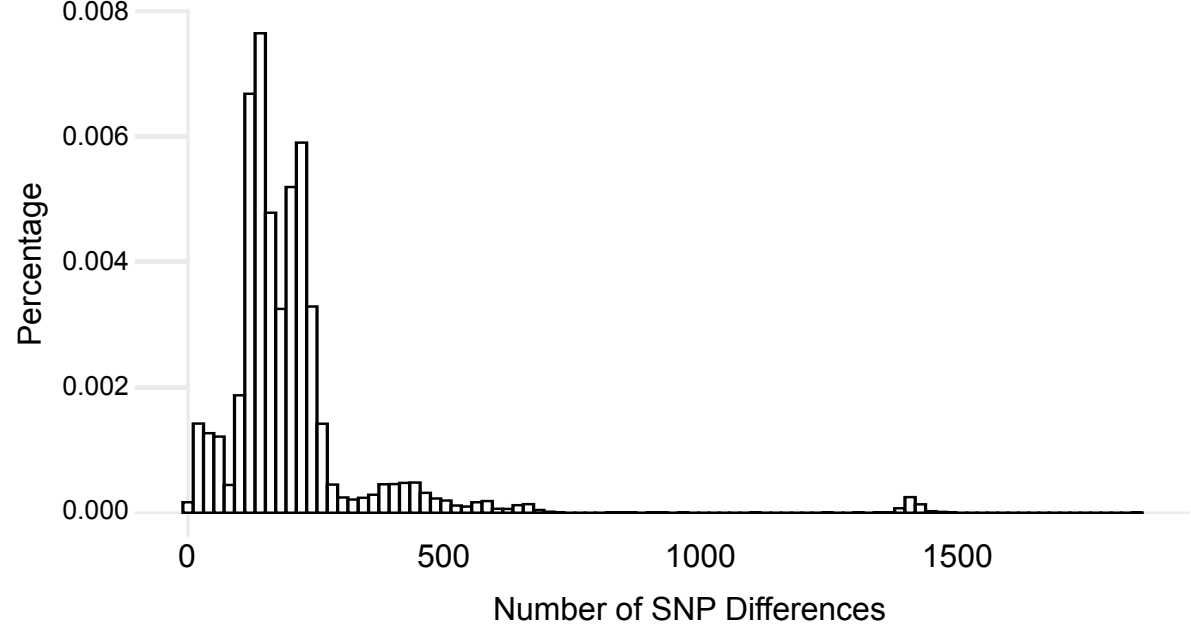



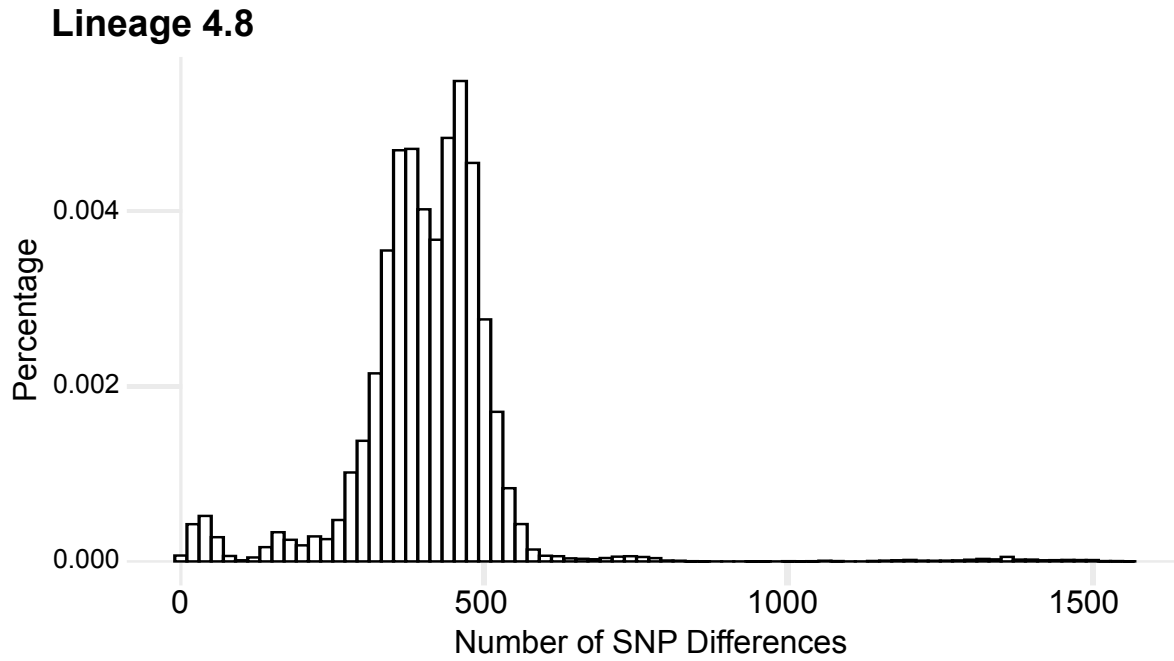

Supplementary Figure 2. Frequency histograms of pairwise distances within phylogenomic lineages.
